# Supplementary material for: Identification of a novel toxicophore in anti-cancer chemotherapeutics that targets mitochondrial respiratory complex I
Source: eLife. 2020 May 20;9:e55845. doi: 10.7554/eLife.55845 (PMC7316505; doi:10.7554/eLife.55845)
Supplement: Supplementary file 1. — ChEMBL was searched for drugs containing a non-fused triazole, which led to the identification of a number of small molecules that are used clinically either routinely or in trials use e.g. the antibiotic tazobactam, the anti-epileptic drug rufinamide, and the cancer chemotherapeutic carboxyamidotriazole. These all contain the triazole ring, but have differing associated physicochemical properties. [file elife-55845-supp1.xlsx]

## Sheet: Sheet 1 - CHEMBL25-chembl_molec
ChEMBL ID	Name	Structure	Molecular Weight	ALogP	pKa (Most Basic)
CHEMBL3544984	Tradipitant		587.91	7.37	2.92
CHEMBL1232510	Solithromycin		845.02	4.6	8.13
CHEMBL281872	ZD-4190		459.28	3.95	5.29
CHEMBL1614707	Mubritinib		468.48	6.06	1.45
CHEMBL404	Tazobactam		300.3	-1.52	0.85
CHEMBL95431	Carboxamidotriazole		424.68	3.2	0.69
CHEMBL1201754	Rufinamide		238.2	0.7	-1.1
