# Supplementary material for: Identification of a novel toxicophore in anti-cancer chemotherapeutics that targets mitochondrial respiratory complex I
Source: eLife. 2020 May 20;9:e55845. doi: 10.7554/eLife.55845 (PMC7316505; doi:10.7554/eLife.55845)
Supplement: Supplementary file 3. — The compounds listed were incubated with mitochondrial membranes and the rate of NADH oxidation was measured spectrophotometrically. [file elife-55845-supp3.xlsx]

## Sheet: Sheet1
			Residual Activity (%) at 50 μM
Name	Structure	Log P*	(NADH: O2)
Ketoconazole		4.01	5.3 ± 0.1%
Terconazole		3.55	4.8± 0.1%
Rufinamide		1.34	107.2 ± 0.1%
